# Supplementary material for: Superior performance of flexible solid-state supercapacitors enabled by ultrafine graphene quantum dot-decorated porous carbon spheres
Source: Royal Society of Chemistry journal article supplement (doi:10.1039/d0nj03163a), 2020-01-01
Supplement: d0nj03163a1.pdf [file d0nj03163a1.pdf]

## Supplementary Information

### Superior performance of flexible solid-state supercapacitor enabled by ultrafine graphene quantum dots decorated porous carbon spheres

Yalei Deng,<sup>a</sup> Yajun Ji, <sup>†a</sup> Fei Chen,<sup>a</sup> Fuyong Ren<sup>a</sup> and Shufen Tan<sup>a</sup>

<sup>a</sup>College of Science, University of Shanghai for Science and Technology, Jungong Road 334#, 200093 Shanghai, China.

<sup>†</sup>Corresponding author. E-mail: jiyajun@usst.edu.cn

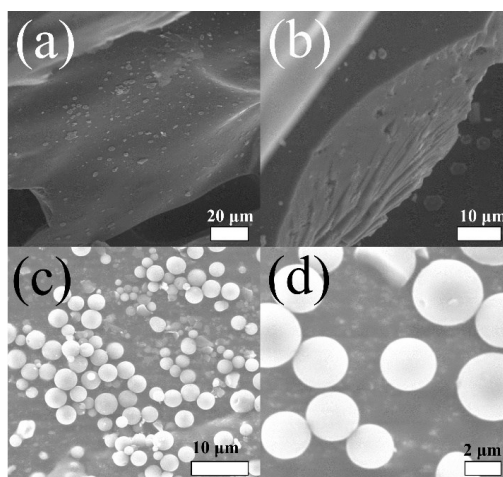

Fig. S1 The SEM images of GQDDC (a and b) and RFSC (c and d).

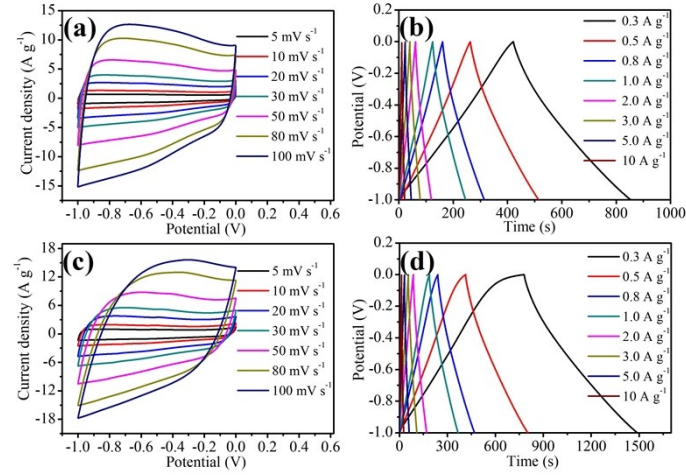

Fig. S2 (a) and (b) The CV and GCD curves of GQDDC; (c) and (d) The CV and GCD curves of RFSC.

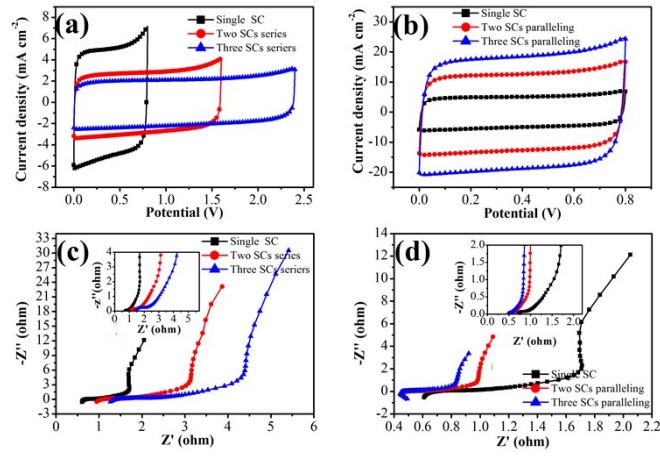

Fig. S3 (a) and (b) The CV curves of FSSSC in series and in paralleling at a scan rate of  $35 \text{ mV s}^{-1}$ ; (c) and (d) The EIS curves of FSSSC in series and in paralleling, respectively.

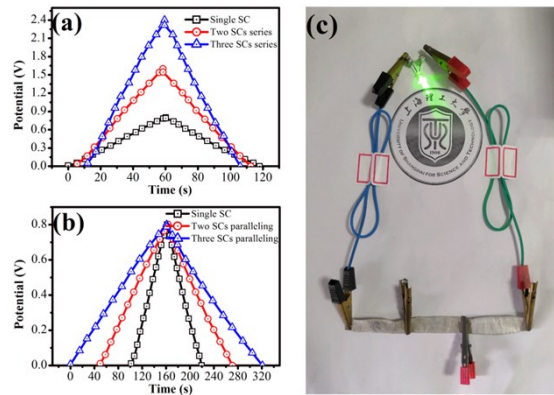

Fig. S4 (a) and (b) The GCD curves of FSSSC in series and in paralleling at a current density of 3

mA cm<sup>-2</sup>; (c) Digital photo of LED powered by three series connected FSSSC.

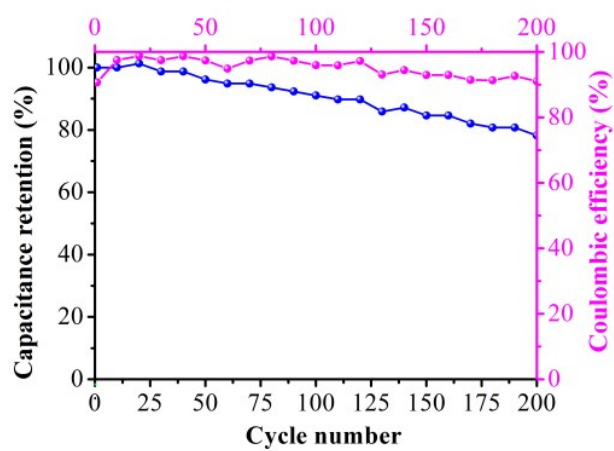

Fig. S5 The stability of FSSSC with bending of 154.4 ° at a current density of 3 mA cm<sup>-2</sup>.
